# Supplementary material for: The impact of human health co-benefits on evaluations of global climate policy
Source: Springer Nature journal article supplement (doi:10.1038/s41467-019-09499-x), 2019-05-07
Supplement: MOESM1 [file 41467_2019_9499_MOESM1_ESM.zip]

Archive with 10 entries (10 files):
- 41467_2019_9499_MOESM1_ESM.pdf
- 41467_2019_9499_MOESM10_ESM.csv
- 41467_2019_9499_MOESM11_ESM.csv
- 41467_2019_9499_MOESM2_ESM.pdf
- 41467_2019_9499_MOESM3_ESM.csv
- 41467_2019_9499_MOESM4_ESM.csv
- 41467_2019_9499_MOESM5_ESM.csv
- 41467_2019_9499_MOESM6_ESM.csv
- 41467_2019_9499_MOESM7_ESM.csv
- 41467_2019_9499_MOESM8_ESM.csv
