# Supplementary material for: The impact of human health co-benefits on evaluations of global climate policy
Source: Springer Nature journal article supplement (doi:10.1038/s41467-019-09499-x), 2019-05-07
Supplement: MOESM1 [file 41467_2019_9499_MOESM1_ESM.zip › 41467_2019_9499_MOESM2_ESM.pdf]

## **Description of Additional Supplementary Information**

File Name: Supplementary Data 1

Description: Data underlying Figure 1

File Name: Supplementary Data 2

Description: Data underlying Figure 2

File Name: Supplementary Data 3

Description: Data underlying Figure 3

File Name: Supplementary Data 4

Description: Data underlying Figure 4

File Name: Supplementary Data 5

Description: Data underlying Figure 5

File Name: Supplementary Data 6

Description: Data underlying Figure 6

File Name: Supplementary Data 7

Description: Data underlying **Table 1**

File Name: Supplementary Data 8

Description: Data underlying **Table 2**

File Name: Supplementary Data 9

Description: Data underlying **Table 3**
