# Supplementary material for: The impact of human health co-benefits on evaluations of global climate policy
Source: Springer Nature journal article supplement (doi:10.1038/s41467-019-09499-x), 2019-05-07
Supplement: MOESM1 [file 41467_2019_9499_MOESM1_ESM.zip › 41467_2019_9499_MOESM3_ESM.csv]

Year	Ref_decarb	RICEAIR_decarb	Ref_temp	RICEAIR_temp	Ref_carbon	RICEAIR_carbon
2015	0.182180761969742	0.287734291303907	1.10723692132051	1.11425566623775	9.75294286971356	8.65936499558691
2025	0.236520761197459	0.360223305460132	1.38667103385741	1.38726580944503	10.3228238642356	8.81618411269427
2035	0.289017460737411	0.439400127687944	1.6627031364581	1.64816957730837	10.5701178719902	8.50766351646357
2045	0.352598345032488	0.523727270328656	1.92243106806169	1.88421421026151	10.4042492842214	7.82730661927891
2055	0.419424449091304	0.607532228589741	2.16413488178648	2.09377770448364	9.95080011634736	6.89658906690536
2065	0.495509593862207	0.687177340143667	2.38745763481565	2.27544056017645	9.16073393356235	5.83970755237395
2075	0.587409974449816	0.768684759045009	2.59175806746785	2.42907166610971	7.91795975223344	4.58656384086476
2085	0.683359298997259	0.836507745467853	2.76387684255344	2.54275784732047	6.40513251656381	3.43701875762581
2095	0.782320296290682	0.89305189480897	2.89107456779832	2.60892696441614	4.63953604964897	2.38868856548645
2105	0.875476106028203	1	2.97793205877135	2.64413164842632	2.8274340098519	0.17179869184
2115	0.912027204428357	1	3.02171924380468	2.6325287292758	2.10023180372825	0.137438953472
2125	1	1	3.03039139032777	2.58785473523685	0.1099511627776	0.1099511627776
2135	1	1	2.99999999999926	2.53060796511278	0.0879609302220801	0.0879609302220801
2145	1	1	2.97369058083536	2.49420257963384	0.070368744177664	0.070368744177664
2155	1	1	2.93957803690023	2.46025735264169	0.0562949953421312	0.0562949953421312
2165	1	1	2.90382692725813	2.43064298180344	0.045035996273705	0.045035996273705
2175	1	1	2.86995996122869	2.40608146330075	0.036028797018964	0.036028797018964
2185	1	1	2.83978300450589	2.38658638065235	0.0288230376151712	0.0288230376151712
2195	1	1	2.8140188412574	2.37176535590639	0.023058430092137	0.023058430092137
