# Supplementary material for: The impact of human health co-benefits on evaluations of global climate policy
Source: Springer Nature journal article supplement (doi:10.1038/s41467-019-09499-x), 2019-05-07
Supplement: MOESM1 [file 41467_2019_9499_MOESM1_ESM.zip › 41467_2019_9499_MOESM4_ESM.csv]

Year	Population_US	Population_Europe	Population_Japan	Population_Russia	Population_Eurasia	Population_China	Population_India	Population_MidEast	Population_Africa	Population_LatAm	Population_OHI	Population_OthAsia	GrossOutput_Refpolicy_coreductionsOn_cobenefitsOff_US	GrossOutput_Refpolicy_coreductionsOn_cobenefitsOff_Europe	GrossOutput_Refpolicy_coreductionsOn_cobenefitsOff_Japan	GrossOutput_Refpolicy_coreductionsOn_cobenefitsOff_Russia	GrossOutput_Refpolicy_coreductionsOn_cobenefitsOff_Eurasia	GrossOutput_Refpolicy_coreductionsOn_cobenefitsOff_China	GrossOutput_Refpolicy_coreductionsOn_cobenefitsOff_India	GrossOutput_Refpolicy_coreductionsOn_cobenefitsOff_MidEast	GrossOutput_Refpolicy_coreductionsOn_cobenefitsOff_Africa	GrossOutput_Refpolicy_coreductionsOn_cobenefitsOff_LatAm	GrossOutput_Refpolicy_coreductionsOn_cobenefitsOff_OHI	GrossOutput_Refpolicy_coreductionsOn_cobenefitsOff_OthAsia	GrossOutput_BAU_US	GrossOutput_BAU_Europe	GrossOutput_BAU_Japan	GrossOutput_BAU_Russia	GrossOutput_BAU_Eurasia	GrossOutput_BAU_China	GrossOutput_BAU_India	GrossOutput_BAU_MidEast	GrossOutput_BAU_Africa	GrossOutput_BAU_LatAm	GrossOutput_BAU_OHI	GrossOutput_BAU_OthAsia	GrossOutput_Refpolicy_coreductionsOff_cobenefitsOff_US	GrossOutput_Refpolicy_coreductionsOff_cobenefitsOff_Europe	GrossOutput_Refpolicy_coreductionsOff_cobenefitsOff_Japan	GrossOutput_Refpolicy_coreductionsOff_cobenefitsOff_Russia	GrossOutput_Refpolicy_coreductionsOff_cobenefitsOff_Eurasia	GrossOutput_Refpolicy_coreductionsOff_cobenefitsOff_China	GrossOutput_Refpolicy_coreductionsOff_cobenefitsOff_India	GrossOutput_Refpolicy_coreductionsOff_cobenefitsOff_MidEast	GrossOutput_Refpolicy_coreductionsOff_cobenefitsOff_Africa	GrossOutput_Refpolicy_coreductionsOff_cobenefitsOff_LatAm	GrossOutput_Refpolicy_coreductionsOff_cobenefitsOff_OHI	GrossOutput_Refpolicy_coreductionsOff_cobenefitsOff_OthAsia	GrossOutput_Fullpolicy_coreductionsOn_cobenefitsOn_US
2015	331.65606	518.739975	126.495647	143.786842	171.678074	1448.366171	1383.197753	576.095027	1162.614559	664.534176999999	133.483764	1134.832903	16.1715182672249	16.5348177620653	4.43507478317092	2.31293318127458	1.16001740261953	12.3032493961115	4.93033307428021	6.37432783127748	2.83761906485969	7.49473228262325	4.95390166127656	4.3238470239359	16.1715182672249	16.5348177620653	4.43507478317092	2.31293318127458	1.16001740261953	12.3032493961115	4.93033307428021	6.37432783127748	2.83761906485969	7.49473228262325	4.95390166127656	4.3238470239359	16.1715182672249	16.5348177620653	4.43507478317092	2.31293318127458	1.16001740261953	12.3032493961115	4.93033307428021	6.37432783127748	2.83761906485969	7.49473228262325	4.95390166127656	4.3238470239359	16.1715182672249
2025	354.949826	521.648785	121.580505	140.543418	176.62936	1465.332521	1512.985207	658.531185	1486.753926	718.542664	141.849703	1251.8501	20.8859360240726	20.7918264561988	5.23630682775978	2.8935657835923	1.67420327734771	17.1740931333809	8.00691705154803	9.77969396225734	5.4478090645028	11.0276450128842	6.38775847471129	7.13223159308314	20.8877578992856	20.7927866073771	5.23662110750816	2.89410606849379	1.67457547168434	17.1780263122103	8.00805042163048	9.78094308325616	5.44835793630944	11.0283026662388	6.38830818315151	7.13311368664625	20.8862920525635	20.7922228915812	5.23640545686406	2.89360535151757	1.67423054315806	17.1744393298057	8.00730139197345	9.78005373205037	5.44806839039239	11.0278703201076	6.38787774165361	7.13246620583173	20.8815709353414
2035	374.315855999999	519.961808	115.212067	135.836501	179.176313	1441.303148	1605.355574	733.482586999999	1858.448265	757.083879	147.266915999999	1342.892588	25.7388694985682	24.9747589013073	5.90244440344066	3.45510377863202	2.26874268321251	22.1537651345389	11.8718809431397	13.8188872310334	9.60328652397845	15.0925532763933	7.84677444233327	10.8125661055632	25.7434000319556	24.9769717383945	5.90313697134395	3.45646511369303	2.26974544738912	22.1637446394502	11.8749367831597	13.8222555753725	9.60495518416193	15.0942845900195	7.84812810425266	10.8151193211442	25.7401575193094	24.9761718117217	5.90277253724991	3.45524290172152	2.26885039789147	22.1550556294796	11.8733782191626	13.8202478778816	9.60451375317939	15.0934238264444	7.84721353363877	10.8135422659993	25.7286985596185
2045	389.841069	514.00822	108.794446	132.730511	180.60049	1387.22726	1658.978162	799.561947999999	2262.903011	779.894579	150.014558	1407.266937	30.7440340642864	29.1042291287903	6.36401676836675	4.06458080303131	2.95599705255925	27.0948383019635	16.5088515617395	18.5039836368477	15.8564491951156	19.5669136208646	9.28401373063448	15.3867307657812	30.7518559060725	29.1075161247893	6.36501676156635	4.06708127096073	2.95791839783599	27.1125904224082	16.5142784481662	18.5101581014428	15.8595655988989	19.5699107364794	9.28628131670146	15.3916714753823	30.747169309855	29.1076472257521	6.36473821692364	4.06491553376477	2.95628186020436	27.0981299016262	16.5127417976229	18.5074545810638	15.8603282470775	19.5691439355392	9.28510054265396	15.3894194298782	30.7255382008482
2055	404.810514999999	503.931307	102.747177	129.695944	179.548307	1310.17059	1678.568111	849.213223999999	2682.158742	787.506715	151.259795999999	1442.986437	36.0635720283697	33.1144771000195	6.95108791359998	4.71537992594715	3.71674176836974	31.8194314992245	21.761806206971	23.6000303270056	24.5567207208002	24.3108903117519	10.7160870589734	20.7263991109822	36.0757020738959	33.1184114253114	6.95236872668769	4.71961646458549	3.72005838687366	31.8476144977341	21.7699867233553	23.6099272676356	24.5610346291381	24.315317515681	10.7194215061707	20.7346493895365	36.0699824433453	33.1213505539045	6.95247979444943	4.71605976230454	3.71736431247052	31.8263148896238	21.7701521328143	23.6073597705536	24.5666983626969	24.3156106050428	10.7183167987033	20.7324673848768	36.0340582395923
2065	419.406366999999	493.688992999999	96.369242	126.393174	176.735708	1228.995209	1665.179391	882.972249	3099.200627	781.044716	151.948988	1453.910275	41.8045466290562	37.1609928801861	7.50972021595708	5.38861232710117	4.54254875971356	36.4736818561291	27.5287381205442	29.0929711142328	36.2374990510178	29.2517890014403	12.1910916196192	26.8114229627277	41.8217656161113	37.1644772955375	7.51111126245754	5.39527358202489	4.54779129614556	36.5146859117084	27.5393002646964	29.1071952969931	36.2408232082467	29.2574178123412	12.1954781061978	26.8235730743665	41.8162799899761	37.1732946600915	7.51211297949606	5.38984068889222	4.54374616838261	36.486374706556	27.5445495914619	29.1067059262749	36.2599590244932	29.2606060609221	12.1951571210429	26.823465784663	41.7617580363508
2075	431.202514	486.166933	91.100643	124.675359	173.578543	1154.43799	1626.927002	904.889347	3494.557911	763.577491	152.192698	1445.40014799999	47.8815055372482	41.4478429433263	8.03730073383962	6.12568491858839	5.43353317483682	41.0692782293665	33.7198432056199	34.9944464792433	51.5778730330511	34.2446294647747	13.731313505226	33.6280147301468	47.9048775822734	41.4492361018876	8.03857763136072	6.13586474288758	5.44145904311009	41.1262970278629	33.7318887964527	35.0137863979102	51.5746265120276	34.2510028691844	13.736703046735	33.6446110169334	47.9012904013121	41.4681971821902	8.04106875541644	6.12773767595902	5.43563218438012	41.0906277320133	33.7471967220438	35.0180716948832	51.6238500603544	34.2596094398855	13.7381368978018	33.6497907457777	47.8261056478837
2085	440.101246	480.819165	87.442977	124.512823	170.471905	1090.114916	1574.797201	917.640257999999	3850.554423	739.223795999999	152.444274	1421.930649	54.1649406609605	46.0038640455927	8.60920995767506	6.95632490224186	6.38902688052287	45.697813410186	40.1815943035246	41.185196166039	70.6724133771933	39.1591060091229	15.3461612266698	40.9921150387106	54.1970000026207	46.0012920443805	8.61021183702084	6.97206456114923	6.40097313863088	45.7771342015569	40.1945556278026	41.2118279528197	70.6524521555449	39.1660951217322	15.3527536974499	41.0146136165438	54.1962160359626	46.0356542990251	8.61484760622461	6.95958242644161	6.39246462820116	45.73147605569	40.2256741964954	41.2231886847667	70.7589727555571	39.1827666789436	15.356928067741	41.0286484480386	54.1008729669795
2095	447.700129	476.350353	84.532388	124.012605	166.874149	1037.552082	1516.59738	921.540258	4155.0123	712.053972	153.084533	1389.056076	60.6962917119936	50.782188347901	9.214812602935	7.82942172770707	7.38775179654188	50.4692233689149	46.8218434468046	47.5117357706379	93.3583470832014	43.9647166738438	17.0616238976992	48.7634920094286	60.7384657339669	50.7719571707488	9.21508758956935	7.85296389670126	7.40504573808237	50.5760050600592	46.8327506310314	47.5464823363348	93.3008415721718	43.9711132785677	17.069103420984	48.7916308294653	60.7429283621454	50.8292180788785	9.22285159194037	7.83430754207282	7.39303068133736	50.5194959759303	46.8885127105435	47.5691080269458	93.5088091418356	43.9997481162696	17.0777135516391	48.8207345575957	60.6316115824636
2105	447.700129	476.350353	84.532388	124.012605	166.874149	1037.552082	1516.59738	921.540258	4155.0123	712.053972	153.084533	1389.056076	66.7201615745229	56.33529059849	10.1222896228185	8.85078092466872	8.60418617340045	57.4448274184508	55.1058809363389	53.6413268617213	113.606236203511	50.0483417780341	18.8969780375222	57.8237098263848	66.7713867648374	56.3069788621672	10.1208904224381	8.88269443411813	8.6267102538806	57.5748601483769	55.1080065210311	53.681142781596	113.46715408236	50.0514801346276	18.902433745551	57.853126973075	66.7851168046276	56.4020117917976	10.1335254614314	8.85780454793657	8.61197303383994	57.5190030729559	55.2035796489946	53.7223684555337	113.836536018467	50.0985493588779	18.9198481308317	57.9092018498684	66.6653481519712
2115	447.700129	476.350353	84.532388	124.012605	166.874149	1037.552082	1516.59738	921.540258	4155.0123	712.053972	153.084533	1389.056076	72.5773985650303	62.2876781924756	11.1363187618542	9.98081064426525	9.96520619201775	65.637796571142	64.3277927885878	59.6505348999146	134.101628067457	56.618609995535	20.8322156851796	67.8947596041548	72.637118971375	62.2279045885362	11.1319435847189	10.0135850018164	9.98613447373951	65.7407745517444	64.3106478102147	59.6922955729906	133.817843497371	56.6146823550698	20.8321536529235	67.9179564511927	72.6628965393967	62.3778876894435	11.1513495469738	9.99040229228438	9.97610858335931	65.7434011844669	64.4645379170743	59.7588475634628	134.429853765324	56.6871688964342	20.8631574253262	68.0163421731673	72.5674122067918
2125	447.700129	476.350353	84.532388	124.012605	166.874149	1037.552082	1516.59738	921.540258	4155.0123	712.053972	153.084533	1389.056076	79.4428443895398	68.8501242332365	12.2988926968999	11.2074595815239	11.4562744731846	73.8054446893547	74.5142051528093	66.6402036058357	155.971639427549	64.076302767093	22.9337501063441	78.4422417085058	79.4765373658678	68.7234320207461	12.2860449883251	11.2349773359507	11.469320766652	73.7994230889025	74.4260561608735	66.6422364139865	155.401973039931	64.0399015010504	22.9142521409877	78.4061824519317	79.5504035203497	68.9658751553736	12.3179939072119	11.219785008857	11.4706049645999	73.9461488692344	74.6947739362355	66.7789967938542	156.411611487528	64.1651821674817	22.973461721705	78.6037295508619	79.4902250799275
2135	447.700129	476.350353	84.532388	124.012605	166.874149	1037.552082	1516.59738	921.540258	4155.0123	712.053972	153.084533	1389.056076	85.9872675665243	75.1684924901687	13.40261907154	12.4046651612417	12.9912446426387	82.4032838828096	85.3368320131313	73.7331669836514	179.289018566334	71.6491199465617	24.9444804227905	89.8432962683327	85.9422670596594	74.9981609123229	13.3874578092365	12.4215174264049	12.9903696141739	82.2246914145106	85.1499198433689	73.6586242980298	178.321538536113	71.6014999377584	24.9015510046948	89.7556602247477	86.1160503620611	75.3138101152246	13.4257215241098	12.4196653931537	13.0091242096433	82.5983432096729	85.5651305976629	73.9046003152876	179.870025139069	71.7588495652745	24.9948458249244	90.0521524495964	86.0783646801537
2145	447.700129	476.350353	84.532388	124.012605	166.874149	1037.552082	1516.59738	921.540258	4155.0123	712.053972	153.084533	1389.056076	92.3970315896652	81.4639352201067	14.4957117772759	13.5961208776331	14.5758178571737	91.3604683142873	96.8129907597265	80.9917203884129	204.02897863314	79.4488618121795	26.9313801383442	102.096021133513	92.2269098603369	81.174744758743	14.4645060462368	13.5970172537805	14.5544369952228	90.9341296532882	96.4192117697868	80.767454468939	202.413626631451	79.3240868387845	26.841745481383	101.825413959686	92.5434298798407	81.6389132823794	14.5221765584492	13.6133838532072	14.5968959270794	91.6242266311447	97.086856627848	81.1936512914599	204.766065580243	79.5770299333668	26.9929100785805	102.354616324414	92.520661863967
2155	447.700129	476.350353	84.532388	124.012605	166.874149	1037.552082	1516.59738	921.540258	4155.0123	712.053972	153.084533	1389.056076	98.7706749417029	87.7919386505257	15.5899845536589	14.7937256884447	16.2099194633053	100.63380145851	108.866737413354	88.4117820817212	230.050058752726	87.4643367758174	28.9186903877612	115.073994768829	98.4304634886593	87.3120914870713	15.5314725597264	14.7732284832262	16.160735943772	99.8509671408436	108.157537023289	87.9669346782377	227.483495500259	87.2046526153971	28.7586236212012	114.484798143695	98.9302751022667	87.9908476100707	15.6190021049732	14.8127624544567	16.2336808195219	100.959442545232	109.180734505823	88.638707725397	230.930015481581	87.6076426297312	28.9892486231228	115.378519313341	98.9182305977698
2165	447.700129	476.350353	84.532388	124.012605	166.874149	1037.552082	1516.59738	921.540258	4155.0123	712.053972	153.084533	1389.056076	105.16554381332	94.1800675606735	16.6922133221957	16.003815761382	17.8914994711127	110.173204439088	121.434473767814	95.9860377937157	257.209018145087	95.6819659477314	30.9185707740855	128.676292138939	104.612998226882	93.4443538988945	16.5969072774108	15.956594620874	17.8069550900223	108.915062323755	120.30184350766	95.2540390346057	253.365258745067	95.2355060825957	30.6660283524909	127.62871743027	105.333886057415	94.3977880457661	16.7229567403161	16.0240927929913	17.9173217890774	110.55614488103	121.781464015681	96.2321229720751	258.217421780267	95.8365863623634	30.9963688425497	129.021968390734	105.330581283843
2175	447.700129	476.350353	84.532388	124.012605	166.874149	1037.552082	1516.59738	921.540258	4155.0123	712.053972	153.084533	1389.056076	111.613737308229	100.641917881955	17.8059823441721	17.2293669195318	19.6172230207009	119.93875693562	134.457170264785	103.704357296198	285.371061053191	104.085677252758	32.937500696797	142.81822259375	110.808282006901	99.5883043889647	17.6654620961659	17.1501894901419	19.4895904777279	118.074571973166	132.792167401629	102.621197977243	279.899776008905	103.404046244757	32.5710823648293	141.162665200157	111.78681979873	100.874083655981	17.8376989723392	17.2503774455644	19.6444724466563	120.375853430241	134.829469631881	103.964051132383	286.49347719379	104.247822366791	33.0210765570536	143.200120398656	111.791655609177
2185	447.700129	476.350353	84.532388	124.012605	166.874149	1037.552082	1516.59738	921.540258	4155.0123	712.053972	153.084533	1389.056076	118.133938587115	107.184180506087	18.9332357674787	18.4716392623524	21.3833651216901	129.898665998415	147.881461428836	111.556583707591	314.412879770741	112.659695146524	34.9790394735389	157.428014727164	117.035907389065	105.751812872	18.7397345316273	18.3553623712667	21.2048212542115	127.284571985047	145.573333369211	110.059782644827	306.938749505644	111.696569877359	34.4773751056466	155.00059025728	118.308424895406	107.427200783751	18.9652873436298	18.4929387387872	21.4114518234373	130.387676309164	148.27159344782	111.824948234834	315.635670868654	112.825915879013	35.0672237547118	157.84156098771	118.321623996915
2195	447.700129	476.350353	84.532388	124.012605	166.874149	1037.552082	1516.59738	921.540258	4155.0123	712.053972	153.084533	1389.056076	124.737970667161	113.810543276665	20.0751372177153	19.7311033361734	23.1863330084695	140.027884886455	161.660361909442	119.534008885044	344.224702170495	121.390074256233	37.045352499275	172.444869354047	123.308045606146	111.93858551107	19.8212975612352	19.5726663468293	22.9490202539143	136.506165901635	158.595995926126	117.562004590435	334.347513515965	120.100405805608	36.3867432089873	169.063588961952	124.911230154177	114.061556137755	20.1070101450385	19.7523230122069	23.2147397679425	140.567139770913	162.061517587946	119.806862649986	345.53553986357	121.557408734504	37.137229889783	172.886135087675	124.933457553493
[truncated: 203 more columns]
