# Supplementary material for: The impact of human health co-benefits on evaluations of global climate policy
Source: Springer Nature journal article supplement (doi:10.1038/s41467-019-09499-x), 2019-05-07
Supplement: MOESM1 [file 41467_2019_9499_MOESM1_ESM.zip › 41467_2019_9499_MOESM5_ESM.csv]

Year	lifeyears_US	lifeyears_Europe	lifeyears_Japan	lifeyears_Russia	lifeyears_Eurasia	lifeyears_China	lifeyears_India	lifeyears_MidEast	lifeyears_Africa	lifeyears_LatAm	lifeyears_OHI	lifeyears_OthAsia	benefits_monetized_US	benefits_monetized_Europe	benefits_monetized_Japan	benefits_monetized_Russia	benefits_monetized_Eurasia	benefits_monetized_China	benefits_monetized_India	benefits_monetized_MidEast	benefits_monetized_Africa	benefits_monetized_LatAm	benefits_monetized_OHI	benefits_monetized_OthAsia	population_US	population_Europe	population_Japan	population_Russia	population_Eurasia	population_China	population_India	population_MidEast	population_Africa	population_LatAm	population_OHI	population_OthAsia	GDP_US	GDP_Europe	GDP_Japan	GDP_Russia	GDP_Eurasia	GDP_China	GDP_India	GDP_MidEast	GDP_Africa	GDP_LatAm	GDP_OHI	GDP_OthAsia
2015	0.105995473002096	0.184884281294453	0.00652572730419333	0.0989352624905208	0.111799861834895	5.59813190901376	6.10787938914535	0.60775105090677	0.22789602010034	0.166010692570001	0.0148310879612033	0.523169267409973	8.19903986543258	9.40037128665796	0.373987527063016	2.57013304856158	1.16396722696731	72.9064858420835	31.5673268890058	10.0141335044619	0.768377423403055	2.84489063383054	0.873203699382119	2.85880715171499	331.65606	518.739975	126.495647	143.786842	171.678074	1448.366171	1383.197753	576.095027	1162.614559	664.534176999999	133.483764	1134.832903	16.1229767121136	16.4744090751733	4.42194067639155	2.30297742861236	1.15432664318517	12.1971304437081	4.88742507298831	6.32963611399789	2.81435644622067	7.47153816217838	4.93081628283499	4.2991462712087
2025	0.0933982517595578	0.13655507559202	0.00680291800735957	0.128515426674801	0.140670589798871	7.58745694744131	10.3621417685518	1.04174521912015	0.293944584357145	0.2581014300697	0.0210283312784229	0.887368010782889	8.7415836889749	8.70168363030937	0.48081677900701	4.28136010286577	2.06848773837705	137.753366976363	80.8483906692017	23.3035797906505	1.51437570791451	6.07811487033105	1.50836660929945	7.35920088420184	354.949826	521.648785	121.580505	140.543418	176.62936	1465.332521	1512.985207	658.531185	1486.753926	718.542664	141.849703	1251.8501	20.7844728426433	20.6778244994957	5.21177766688322	2.87290099640777	1.66104464243647	16.9485942590969	7.90920101691994	9.68037682989757	5.38455876404112	10.9752848543678	6.34306060703672	7.07154303573471
2035	0.0793735551704186	0.100550972177768	0.00641438238494986	0.155422637065429	0.183866212969816	9.7739332994278	16.8404725302433	1.69056331734833	0.488367008174566	0.348357371086719	0.0273196600433178	1.50819174434453	8.68592952031252	7.72034050036624	0.542907471677507	6.37139175525144	3.61988757365694	233.742553459743	185.428966397147	48.3304355288461	3.59770649065335	10.7515880537714	2.32593194307371	17.8984840962187	374.315855999999	519.961808	115.212067	135.836501	179.176313	1441.303148	1605.355574	733.482586999999	1858.448265	757.083879	147.266915999999	1342.892588	25.5571300111585	24.7798036426327	5.86270494959265	3.41860949632114	2.24332134555691	21.7480934022799	11.6821725954183	13.629143087704	9.45416360300572	14.9918516431171	7.76850521558191	10.6861531024943
2045	0.064024509827082	0.0719836399567937	0.00581612166128559	0.175972159020809	0.225253761987653	11.3657749101516	25.6714436320283	2.49155888200515	0.969174937307773	0.410660507735953	0.031656411624635	2.42562947232407	8.02905774971507	6.50907610628362	0.553367969502091	8.62506982269457	5.73072466964647	345.208386350567	384.486470065242	88.2551946013755	9.90398350640338	16.0507593460224	3.13168196120896	39.6265427545281	389.841069	514.00822	108.794446	132.730511	180.60049	1387.22726	1658.978162	799.561947999999	2262.903011	779.894579	150.014558	1407.266937	30.4503992264976	28.80152104776	6.30675532950679	4.00530852148879	2.91186620216589	26.4419828171275	16.1802058184252	18.1778954097417	15.5434804564979	19.3947870346559	9.16025380794222	15.1533089587465
2055	0.0507111506182797	0.048542004747912	0.00506298568242785	0.185718533323481	0.245386090559296	11.610763107941	35.4260992974742	3.26796658522008	1.90184299092882	0.425103719444646	0.0326856695046647	3.47321434582969	7.16295116248243	5.07811986972413	0.550533151110835	10.7336595977781	7.87044625049714	435.539496318624	693.676743545414	139.038983376213	25.6939551570315	20.4363728441533	3.69107093681194	74.9453622662698	404.810514999999	503.931307	102.747177	129.695944	179.548307	1310.17059	1678.568111	849.213223999999	2682.158742	787.506715	151.259795999999	1442.986437	35.6257525571877	32.6797961895716	6.87237029314122	4.62642596187527	3.6473057857841	30.8616996483822	21.2451270720632	23.0904765658574	23.9661072672923	24.0438724244165	10.5354473442242	20.3384579550185
2065	0	0.0310340884773281	0.00409520736304024	0.184166416747197	0.237516962080753	10.7110870842944	43.3664833512307	3.79259514582313	3.42848352084413	0.386725646823586	0.0314991729219543	4.3886245596044	0	3.70143846699147	0.510692265951229	12.4169642536885	9.43034760809189	488.227518554439	1080.60477960153	190.370417276846	59.0109645722912	22.496415533228	4.00576105072814	121.411803254968	419.406366999999	493.688992999999	96.369242	126.393174	176.735708	1228.995209	1665.179391	882.972249	3099.200627	781.044716	151.948988	1453.910275	41.193113811573	36.5728218650565	7.40798407663866	5.26454986274169	4.44205216505143	35.1626454584397	26.7787048608848	28.35473585758	35.2131955553282	28.8691849047205	11.9431187854264	26.219085571514
2075	0	0.0195186774241251	0.00315836193100431	0.175011941578307	0.207788595676855	9.2300519367495	47.6534491241526	3.99608177176708	5.66049622023522	0.314020793093612	0.029280467370869	4.97973749453713	0	2.62389549240651	0.443904228853233	13.5276003544981	10.0166712909727	501.332938827929	1485.13935577389	234.220373169611	122.631898094149	21.8105868637016	4.16312274454479	173.484724498038	431.202514	486.166933	91.100643	124.675359	173.578543	1154.43799	1626.927002	904.889347	3494.557911	763.577491	152.192698	1445.40014799999	47.0657992431007	40.6819420300869	7.91147282860518	5.96104246397395	5.2970102290566	39.3541958920141	32.6928436483684	33.979196925308	49.9081914615352	33.7280522872509	13.4046132421218	32.7760420540166
2085	0	0.0120348238495954	0.00251377354345405	0.154649901138378	0.155874079427875	7.42389856142588	47.3483442935497	3.92501699915466	8.40207623419244	0.229059334901718	0.026019217892964	5.06002593831702	0	1.8070256272371	0.392533655485123	13.5878141934136	9.00432886855218	473.130027093397	1812.39817966059	265.674377914584	225.693658069921	18.7344873510156	4.10496813990668	218.007672054539	440.101246	480.819165	87.442977	124.512823	170.471905	1090.114916	1574.797201	917.640257999999	3850.554423	739.223795999999	152.444274	1421.930649	53.1366539259997	45.0473276782331	8.45998702006237	6.77881652036186	6.23800603596559	43.5936890105272	38.8598986090558	39.8677061041963	68.1303025214133	38.5053081600314	14.9345624229656	39.8455051791555
2095	0	0.0074145916034815	0.00210183209981773	0.140460180433386	0.1133077847733	5.64164285358467	44.4233221627832	3.64348794683971	10.9797952063539	0.156714201540135	0.0232098248430028	4.74235255243892	0	1.22801608015002	0.358891825270717	13.8071206734619	7.69039187649649	413.757895163506	2053.06956394002	284.494394355533	364.167926597074	14.8857391836695	4.00878727869596	249.086633586663	447.700129	476.350353	84.532388	124.012605	166.874149	1037.552082	1516.59738	921.540258	4155.0123	712.053972	153.084533	1389.056076	59.4542069450292	49.6298318987055	9.0440684924738	7.64893324358862	7.23055979234646	48.1132937667311	45.2051743733587	45.8826352592698	89.7223745708223	43.1789866615937	16.5601777868135	47.3013799508166
2105	0	0.00553854202882994	0.00230998747371232	0.126894876176487	0.0822221670531095	4.7079883880526	46.3477727940091	3.26051872577558	12.1899153700981	0.132849950699407	0.0222643095942133	4.92625315230935	0	1.0044788632755	0.426698481169126	13.975838485044	6.46651598317919	388.370465270907	2509.64167732419	289.182601805101	494.561636855033	14.2801765318829	4.2096109425392	304.689765915571	447.700129	476.350353	84.532388	124.012605	166.874149	1037.552082	1516.59738	921.540258	4155.0123	712.053972	153.084533	1389.056076	65.3761736418415	54.729875542274	9.87488715939594	8.67111393334427	8.4425556764331	54.7611953320111	53.0310160976574	51.6925291722807	108.744570137698	48.9160690258988	18.2662044561829	55.7484271957929
2115	0	0.00300947526388214	0.00188809305784658	0.111896865596385	0.0563634887927472	3.76173586386316	40.6553590239059	2.66366561055105	11.3857923143909	0.0856647877850838	0.0184599682651203	4.05279565348011	0	0.595930549573397	0.377703966354272	13.7547008556005	5.10359060507042	356.796492801825	2566.72462484517	260.089706410397	545.874422726102	10.3112886405526	3.80374043947256	296.900682340839	447.700129	476.350353	84.532388	124.012605	166.874149	1037.552082	1516.59738	921.540258	4155.0123	712.053972	153.084533	1389.056076	71.2416553766094	60.4914566422637	10.8715656077573	9.79985563128448	9.7978636047659	62.5420792887978	62.0286024985868	57.5891450517574	128.318204561429	55.3806420155374	20.140491425963	65.5426196126519
2125	0	0.00151681902874748	0.00149124057744404	0.0964145656631463	0.0366544332330571	2.98629123109783	34.5588452795885	2.09119308936887	10.3360870139071	0.0514255324709691	0.0151641868166949	3.22878806594696	0	0.33214582276765	0.329964696934426	13.3331985287152	3.82227945489788	318.138074333533	2533.97949738755	228.643096548763	576.525542799492	7.01586059216591	3.44215003687384	273.861540796649	447.700129	476.350353	84.532388	124.012605	166.874149	1037.552082	1516.59738	921.540258	4155.0123	712.053972	153.084533	1389.056076	78.1292648707694	66.8935428055289	12.0249618020448	11.0249885292192	11.2836434574343	70.2463115745849	72.0401144050548	64.4853599952511	149.286722311915	62.7696257193982	22.1871137404894	75.8855024824116
2135	0	0.000771475446565656	0.00118411362951871	0.0825568464330759	0.0232236676555466	2.33255889517152	28.6794138192432	1.6262781812691	9.14089392065469	0.0302206682417169	0.0126494712216596	2.47466558198215	0	0.184708078592498	0.286280577310861	12.6566905305626	2.75034386855158	277.096453842715	2415.71121357743	197.204786787966	586.502590671637	4.62129140022033	3.12656992740405	241.143620950839	447.700129	476.350353	84.532388	124.012605	166.874149	1037.552082	1516.59738	921.540258	4155.0123	712.053972	153.084533	1389.056076	84.6991628013727	73.1396626967678	13.1390040153814	12.2223162238386	12.8147345803213	78.3318505157081	82.7571002427722	71.5187289684538	171.727580894165	70.3568968659437	24.1593872079335	87.1819474652441
2145	0	0.000391604678724153	0.000940457459267089	0.0702034126581641	0.0143470844691885	1.80144347446466	23.3305622975306	1.25320367804054	7.89909058030792	0.0173812486862192	0.010662571742651	1.83409303585816	0	0.10168762798625	0.246350677535157	11.8108725977455	1.9084404103121	236.877099238078	2234.07787771305	167.189896613569	576.751351515403	2.95203417332924	2.84675299447895	203.490251207243	447.700129	476.350353	84.532388	124.012605	166.874149	1037.552082	1516.59738	921.540258	4155.0123	712.053972	153.084533	1389.056076	91.1154313591225	79.3248785750309	14.2356908041945	13.4125146839907	14.3935650897995	86.7046667517833	94.0813676793441	78.6838386069391	195.420586888611	78.1425883885064	26.0962412871582	99.2634927214289
2155	0	0.00019730824023623	0.00074520137701613	0.0592738053160913	0.00865725413885744	1.38161883560127	18.6782551053054	0.95787936067034	6.69038374338497	0.00979559030147539	0.00905555086267864	1.32168883271309	0	0.0552337221749184	0.210212195360516	10.861324093193	1.28181789399138	199.708689755982	2014.42463085437	139.660055345168	550.548483784945	1.83376701334384	2.59631097635058	165.493484292557	447.700129	476.350353	84.532388	124.012605	166.874149	1037.552082	1516.59738	921.540258	4155.0123	712.053972	153.084533	1389.056076	97.4873704156504	85.5161733456195	15.3302133906879	14.6085265171673	16.021367803704	95.3122569847197	105.960802905925	85.9921019300609	220.243615986836	86.1312854876317	28.0241193920874	112.026040261206
2165	0	9.83809725783671e-05	0.000588275811732474	0.0496911675303787	0.00511240655051841	1.05591916396976	14.7662400693377	0.726952248051651	5.56955250242067	0.00541833872797146	0.00773258186934059	0.930944522103588	0	0.0295462834555402	0.177851117663074	9.85829168892866	0.836071085936108	166.714425667794	1778.4672144057	115.167393627924	512.023624407324	1.11067502606976	2.36984089760563	130.454932296169	447.700129	476.350353	84.532388	124.012605	166.874149	1037.552082	1516.59738	921.540258	4155.0123	712.053972	153.084533	1389.056076	103.871717768045	91.7446861593426	16.4300750795959	15.816446358422	17.6958426977455	104.107626494338	118.333159042472	93.4374171588809	246.0528974595	94.3122792469809	29.956067645117	125.372997458665
2175	0	4.84764373583421e-05	0.00046233261338939	0.0413717728649239	0.00296077915173907	0.806279131667723	11.5607399698568	0.54836996877945	4.56870509976155	0.00294782169801571	0.006628309866088	0.644227328955568	0	0.0155555210638932	0.149212262387132	8.8423146415664	0.531199442504006	138.2378858669	1543.09244650327	93.9169874207033	465.52342679099	0.657814376626332	2.16317807853124	100.248844977216	447.700129	476.350353	84.532388	124.012605	166.874149	1037.552082	1516.59738	921.540258	4155.0123	712.053972	153.084533	1389.056076	110.300801707828	98.026396766144	17.5393674330818	17.0391639864281	19.413552919585	113.052898274187	131.140499205999	101.010765161652	272.713854241721	102.671412051056	31.8991866348597	139.221894630676
2185	0	2.35904124795485e-05	0.000361614468686625	0.0342193821264079	0.00168503521457325	0.616223903007799	8.98523336033712	0.411576753814182	3.70136773257016	0.00158118718500415	0.00569614963119862	0.440185940085279	0	0.00805973150051186	0.124166050429709	7.8453596940787	0.329679535824414	114.124008786308	1319.94821278448	75.856934067224	415.026233622186	0.382136265630338	1.97308555759897	75.5236346836489	447.700129	476.350353	84.532388	124.012605	166.874149	1037.552082	1516.59738	921.540258	4155.0123	712.053972	153.084533	1389.056076	116.793906941034	104.369646014452	18.6604025860008	18.2779357374528	21.1707593756281	122.117671535814	144.330478519928	108.703022220273	300.104218930369	111.1942563577	33.8574829070176	153.501994376595
2195	0	1.1334721403557e-05	0.000281435970681084	0.0281270540469606	0.000944169677639947	0.471903430444432	6.9461131272611	0.307618850929721	2.96755555266383	0.000838433143266808	0.00490195829743102	0.298381067325546	0	0.00411036346459435	0.102509188840716	6.89148337194341	0.200374451193164	93.9516989730413	1116.02907649897	60.7666997499629	363.803917839998	0.218435796368394	1.79708249153497	56.0800284292986	447.700129	476.350353	84.532388	124.012605	166.874149	1037.552082	1516.59738	921.540258	4155.0123	712.053972	153.084533	1389.056076	123.363573740985	110.779282414267	19.7946183888943	19.5332682660347	22.9639040953504	131.277875657483	157.857120902403	116.506424781062	328.115918277496	119.867861676858	35.8334431211136	168.152863854875
