# Supplementary material for: The impact of human health co-benefits on evaluations of global climate policy
Source: Springer Nature journal article supplement (doi:10.1038/s41467-019-09499-x), 2019-05-07
Supplement: MOESM1 [file 41467_2019_9499_MOESM1_ESM.zip › 41467_2019_9499_MOESM6_ESM.csv]

Year	Chi1_Ref_decarb	Chi1_Ref_temp	Chi1_RICEAIR_decarb	Chi1_RICEAIR_temp	Chi0_5_Ref_decarb	Chi0_5_Ref_temp	Chi0_5_RICEAIR_decarb	Chi0_5_RICEAIR_temp	Chi0_75_Ref_decarb	Chi0_75_Ref_temp	Chi0_75_RICEAIR_decarb	Chi0_75_RICEAIR_temp	Chi1_25_Ref_decarb	Chi1_25_Ref_temp	Chi1_25_RICEAIR_decarb	Chi1_25_RICEAIR_temp	Chi1_5_Ref_decarb	Chi1_5_Ref_temp	Chi1_5_RICEAIR_decarb	Chi1_5_RICEAIR_temp
2015	0.182180761969742	1.10723692132051	0.287734291303907	1.11425566623775	0.155580849261512	1.05276474153159	0.304121895203924	1.06856106897428	0.172872531593023	1.08436817449187	0.295253855166402	1.09452946211174	0.18439710681496	1.12459342607315	0.281604779642729	1.12985883451094	0.190177663160498	1.13877357617909	0.276602935077724	1.14262095746882
2025	0.236520761197459	1.38667103385741	0.360223305460132	1.38726580944503	0.196611249289405	1.27237819506179	0.391127099556311	1.28948438643188	0.223316803036339	1.34088619593479	0.372684696270122	1.34657779217982	0.240441663306138	1.42025558276352	0.35178946669065	1.41811440038962	0.248915400458012	1.44632836780468	0.345815241727469	1.44259964287901
2035	0.289017460737411	1.6627031364581	0.439400127687944	1.64816957730837	0.236066658843584	1.4961333574418	0.478520258908006	1.50271785926505	0.273961469250951	1.59773203881232	0.45367363499732	1.5885969490203	0.296597055021999	1.71039526280328	0.430343228238242	1.69262037780816	0.308594184296229	1.74617818866236	0.423685302954594	1.72744611082904
2045	0.352598345032488	1.92243106806169	0.523727270328656	1.88421421026151	0.274221367476185	1.70790655701001	0.565287767642695	1.69424974346989	0.327718063977061	1.83955244100358	0.538765659385326	1.80706253791697	0.357174515941952	1.98210417425762	0.512977792975909	1.94098560206849	0.373479137205217	2.02578551270836	0.504053857231487	1.98501985004323
2055	0.419424449091304	2.16413488178648	0.607532228589741	2.09377770448364	0.311645037418815	1.90552627168319	0.651001217671217	1.86239908405478	0.385372734288728	2.06575605463217	0.624848231480931	2.0008566351602	0.423033509436017	2.2343236268242	0.593487427158274	2.16142014489138	0.44472164179234	2.28373293219807	0.581204110971906	2.21376253215378
2065	0.495509593862207	2.38745763481565	0.687177340143667	2.27544056017645	0.34978465784355	2.09044333446455	0.735116983053467	2.00728530985309	0.45065797643576	2.27733392848405	0.708439713992247	2.16888843971083	0.496775964474289	2.46637374729783	0.669344186289212	2.35295866923999	0.525195211008608	2.51878314909162	0.653863381988658	2.41326124061047
2075	0.587409974449816	2.59175806746785	0.768684759045009	2.42907166610971	0.39623264199098	2.26676178446924	0.83540153227716	2.13190650499128	0.531056659628811	2.47542820082527	0.795861238494965	2.31069363690361	0.581028424665147	2.67703333572498	0.741616714642989	2.51559191911621	0.613667193194813	2.72860074468112	0.724157191157922	2.58385144279261
2085	0.683359298997259	2.76387684255344	0.836507745467853	2.54275784732047	0.451567514672616	2.4279452014808	0.89789249541274	2.21272714709918	0.631444073304004	2.65066474160663	0.865670207169294	2.4117584817783	0.676053190143061	2.85450178542398	0.812291738435096	2.64020624835411	0.71146882234578	2.90067730779346	0.793130723597064	2.71639822889169
2095	0.782320296290682	2.89107456779832	0.89305189480897	2.60892696441614	0.527970498357574	2.57001498829349	1	2.255863859819	0.710428370058015	2.78449331147515	1	2.47490241431146	0.772779432126506	2.98520668448454	0.868332477102779	2.71771516632516	0.803345234516936	3.02114799737483	0.849636522373828	2.80192268368584
2105	0.875476106028203	2.97793205877135	1	2.64413164842632	0.618850274647876	2.69812290633626	1	2.23719785979806	0.799461061617849	2.88656192704025	1	2.47468313434382	0.84425932134445	3.07403816353574	1	2.76297801519034	0.872064406516288	3.09821898173942	0.912862980995711	2.85300190551036
2115	0.912027204428357	3.02171924380468	1	2.6325287292758	0.704857586560536	2.80920213803993	1	2.1826278278914	0.818565778908641	2.94738655348943	1	2.43838014093417	1	3.12852965521266	1	2.75857655261825	1	3.13627475165501	1	2.87069460798528
2125	1	3.03039139032777	1	2.58785473523685	0.794954469231697	2.89637274047209	1	2.1022331484075	1	2.99999999999995	1	2.37632421167063	1	3.12024990998245	1	2.71888636903193	1	3.11865696042133	1	2.84394903720094
2135	1	2.99999999999926	1	2.53060796511278	0.867839432788225	2.95764019780797	1	2.01427389802785	1	2.9929035199042	1	2.30680700244603	1	3.08000524096206	1	2.66482291655481	1	3.07337522650106	1	2.79658838358273
2145	1	2.97369058083536	1	2.49420257963384	0.87152949154676	2.99999999999591	1	1.9511153172014	1	2.97692653032995	1	2.26188933504679	1	3.04808444964254	1	2.63004462759631	1	3.0388367724424	1	2.76422131273439
2155	1	2.93957803690023	1	2.46025735264169	0.918633160816797	3.0336460971105	1	1.89400047333068	1	2.94542239001295	1	2.22235916264545	1	3.01067772477269	1	2.59633124541357	1	2.99999999999328	1	2.72995405985733
2165	1	2.90382692725813	1	2.43064298180344	1	3.06455881025356	1	1.84476139155919	1	2.90808851810771	1	2.18956535796771	1	2.97268875596419	1	2.56568450243728	1	2.96099864376629	1	2.69671214911652
2175	1	2.86995996122869	1	2.40608146330075	1	3.0586332617504	1	1.80421396567072	1	2.87078659374283	1	2.16388319964422	1	2.93685002634478	1	2.53895751355289	1	2.92412441549814	1	2.66601323404278
2185	1	2.83978300450589	1	2.38658638065235	1	3.03339325876659	1	1.77247698100307	1	2.83682508221765	1	2.14507136222105	1	2.90451341839734	1	2.51630938880188	1	2.89050748986838	1	2.63851105291888
2195	1	2.8140188412574	1	2.37176535590639	1	2.99999999999504	1	1.74920849531928	1	2.80784436134232	1	2.13252446151252	1	2.87617631901347	1	2.49751067268045	1	2.86057393382383	1	2.61435385858255
