# Supplementary material for: The impact of human health co-benefits on evaluations of global climate policy
Source: Springer Nature journal article supplement (doi:10.1038/s41467-019-09499-x), 2019-05-07
Supplement: MOESM1 [file 41467_2019_9499_MOESM1_ESM.zip › 41467_2019_9499_MOESM7_ESM.csv]

Year	Ref_015_decarb	RICEAIR_015_decarb	Ref_001_decarb	RICEAIR_001_decarb	Ref_035_decarb	RICEAIR_035_decarb
2015	0.182180761969742	0.287734291303907	0.462124741567514	0.519592976609237	0.0918616995319287	0.245727434026162
2025	0.236520761197459	0.360223305460132	0.593003118083805	0.658935177992089	0.119927237275567	0.304011896689621
2035	0.289017460737411	0.439400127687944	0.72778240006961	1	0.143781840747607	0.369572653741842
2045	0.352598345032488	0.523727270328656	0.84072734739578	1	0.166387711093168	0.439477616998302
2055	0.419424449091304	0.607532228589741	1	1	0.189125447431521	0.508838820550586
2065	0.495509593862207	0.687177340143667	1	1	0.214193382654076	0.569931091749647
2075	0.587409974449816	0.768684759045009	1	1	0.24377436785471	0.621246773915065
2085	0.683359298997259	0.836507745467853	1	1	0.278582886568964	0.663487348984102
2095	0.782320296290682	0.89305189480897	1	1	0.31705556657185	0.726289044428953
2105	0.875476106028203	1	1	1	0.371645878857364	0.784166341468084
2115	0.912027204428357	1	1	1	0.43809070219226	0.843588330974357
2125	1	1	1	1	0.517031699111166	0.883062230990921
2135	1	1	1	1	0.605511600866373	0.937501418517106
2145	1	1	1	1	0.702425392478473	1
2155	1	1	1	1	0.793970868272472	1
2165	1	1	1	1	0.86286026286684	1
2175	1	1	1	1	1	1
2185	1	1	1	1	1	1
2195	1	1	1	1	1	1
2205	1	1	1	1	1	1
2215	1	1	1	1	1	1
2225	1	1	1	1	1	1
2235	1	1	1	1	1	1
2245	1	1	1	1	1	1
