# Supplementary material for: The impact of human health co-benefits on evaluations of global climate policy
Source: Springer Nature journal article supplement (doi:10.1038/s41467-019-09499-x), 2019-05-07
Supplement: MOESM1 [file 41467_2019_9499_MOESM1_ESM.zip › 41467_2019_9499_MOESM8_ESM.csv]

Year	FUND_Ref_decarb	FUND_AIR_decarb
2019	0.00514984447774918	0.0161326870825509
2020	0.00691519683098544	0.0214235678252944
2021	0.00871509991870519	0.0266893835205709
2022	0.0105431650685942	0.0319474196255326
2023	0.0124078164903649	0.0609779011017131
2024	0.0143058017519659	0.0859575346316916
2025	0.0162424465173724	0.107738654431055
2026	0.0182160193904002	0.126960801234397
2027	0.0202183902384033	0.144089644870525
2028	0.0222694023057424	0.159495598146194
2029	0.0243504349564866	0.173472032101778
2030	0.0264738152063682	0.18625496160625
2031	0.0286314678952801	0.198034293567719
2032	0.0308317099161847	0.208961495023396
2033	0.0330684284795272	0.219164359450796
2034	0.035349875847016	0.228747832651522
2035	0.037666776407327	0.237800421671911
2036	0.0400246739060449	0.246394285408809
2037	0.0424214074470886	0.25459072937165
2038	0.0448564556089233	0.262442448826637
2039	0.0472987783268444	0.26999258511323
2040	0.0498139599428569	0.277278661433137
2041	0.0523623837747532	0.284331457269384
2042	0.054949924187151	0.291177690663015
2043	0.0575753384933308	0.297838829579687
2044	0.060232845045814	0.304331668223718
2045	0.0629296737115771	0.310896770346985
2046	0.0656574100867889	0.317612831018627
2047	0.0684234577034288	0.324456709747627
2048	0.0712180740291112	0.331417148526432
2049	0.0740335206679182	0.338478073848079
2050	0.0768724233717002	0.345629897728997
2051	0.0797448538158151	0.352832348140337
2052	0.08264339922067	0.360100878953223
2053	0.0855744847334312	0.367422119095647
2054	0.0885327605915723	0.374800232883016
2055	0.0915221242785881	0.382230037195015
2056	0.0945480423196264	0.389671855343153
2057	0.0975980161587715	0.397127743240933
2058	0.100678936437694	0.404594709404486
2059	0.103789497805202	0.412069959798399
2060	0.106931434822447	0.419567729968144
2061	0.110097967702716	0.427050064436641
2062	0.113294665236068	0.434519165962818
2063	0.116523025973326	0.441975040351801
2064	0.119793314533671	0.44942173709154
2065	0.123076584186694	0.456855156438951
2066	0.12638905531084	0.464221151472963
2067	0.129736378147528	0.4715114078541
2068	0.133108646246047	0.478747351006057
2069	0.136511136962563	0.485933743247953
2070	0.139942524722902	0.493078607219762
2071	0.143407754688982	0.500172983550126
2072	0.14690440043207	0.507213212705312
2073	0.150431714248194	0.514212688074135
2074	0.153992046309288	0.521164919938187
2075	0.157592455234075	0.528065687384358
2076	0.174324948573955	0.534921583305186
2077	0.189147679746268	0.541699136649772
2078	0.202411516121356	0.548399581750369
2079	0.214386395860329	0.555012757319562
2080	0.225286256485005	0.561549466789825
2081	0.235281310803146	0.568003316032492
2082	0.244508835088514	0.574373872287089
2083	0.253080741132975	0.580663663367808
2084	0.261088049517257	0.586856970031118
2085	0.268607218816774	0.592952631746322
2086	0.27570255743756	0.598958925583699
2087	0.282429588787031	0.604874456986671
2088	0.288829933483303	0.610565863647959
2089	0.294942989797908	0.616044190928923
2090	0.300801315009063	0.62132034700041
2091	0.306435201739786	0.62641088207838
2092	0.311864832268613	0.631325498950124
2093	0.317113784214385	0.636071327898635
2094	0.322209056381154	0.640655207823921
2095	0.327147305777883	0.645088911975752
2096	0.332062956780534	0.649384424773647
2097	0.337019730304498	0.65354339931037
2098	0.342000725215193	0.65754693258703
2099	0.346986899921909	0.66145506578408
2100	0.351993018645726	0.665260657632356
2101	0.357112263664804	0.669060024361106
2102	0.362237976956114	0.672762319524307
2103	0.367335999833796	0.676373438179254
2104	0.372427250223605	0.679895310923798
2105	0.377499211998348	0.683329839447082
2106	0.38256188283757	0.686677465103642
2107	0.387604865876539	0.689940231411472
2108	0.392639159569583	0.693118438909372
2109	0.39765235956186	0.696216573909432
2110	0.40265799455173	0.699234295933747
2111	0.407619911699032	0.702168817325327
2112	0.412565409121544	0.705025986190444
2113	0.417474874649106	0.707808045658648
2114	0.422356135473549	0.710513528797655
2115	0.42720371541677	0.713142218587757
2116	0.432012175105772	0.715702264608661
2117	0.436780974349804	0.718188651322393
2118	0.441514091287719	0.72060504435887
2119	0.44620526214831	0.722952856235479
2120	0.450853282841383	0.725233756188969
2121	0.45545572676573	0.727446140022554
2122	0.460022234471214	0.729593790721885
2123	0.464521315058058	0.731676602893926
2124	0.468972012655728	0.733708513308031
2125	0.4733804806941	0.735669182921768
2126	0.477729007887193	0.737562613920181
2127	0.482024581377923	0.739391254751929
2128	0.486265324981289	0.741157364076936
2129	0.490434556510169	0.742864330314627
2130	0.494572616035265	0.744513515000133
2131	0.498634278551764	0.746105086087207
2132	0.502623064677895	0.747643185260544
2133	0.506554259199387	0.749129904693147
2134	0.510429528738512	0.750565980469667
2135	0.514231943519503	0.751953285508481
2136	0.517977334461859	0.75329521447028
2137	0.521648203760414	0.754591824461732
2138	0.525262132633723	0.755845499755541
2139	0.528806362942515	0.757055889706239
2140	0.532282297011281	0.758249939965815
2141	0.535699257069859	0.759423373809385
2142	0.539048694911693	0.760575737901683
2143	0.542329185479458	0.761706983215001
2144	0.545549231988844	0.762818927865688
2145	0.548711673217425	0.763908618574072
2146	0.551823504446648	0.764973173435767
2147	0.554820637253892	0.766041344992515
2148	0.557730347627671	0.767091089075256
2149	0.560549885284859	0.768128200007665
2150	0.563293418875754	0.769157769461348
