# Supplementary material for: The impact of human health co-benefits on evaluations of global climate policy
Source: Springer Nature journal article supplement (doi:10.1038/s41467-019-09499-x), 2019-05-07
Supplement: MOESM1 [file 41467_2019_9499_MOESM1_ESM.zip › 41467_2019_9499_MOESM10_ESM.csv]

Year	Ref_decarb	Ref_temp	RICEAIR_decarb_2y	RICEAIR_temp_2y	RICEAIR_decarb_1y	RICEAIR_temp_1y	RICEAIR_decarb_4y	RICEAIR_temp_4y	RICEAIR_decarb_8y	RICEAIR_temp_8y	RICEAIR_decarb_16y	RICEAIR_temp_16y	RICEAIR_decarb_VSL	RICEAIR_temp_VSL	RICEAIR_decarb_VSLld	RICEAIR_temp_VSLld
2015	0.182180761969742	1.10723692132051	0.287734291303907	1.11425566623775	0.23727221108258	1.1109055085699	0.369444769995555	1.11965965120917	0.491715157564529	1.12769772138639	0.655406251571517	1.13836668847379	0.442309459056101	1.12445680927236	0.6135852729641	1.13565102901776
2025	0.236520761197459	1.38667103385741	0.360223305460132	1.38726580944503	0.300138743402434	1.38697503905788	0.456999522305013	1.38748555527591	0.598740406890801	1.38711755346094	0.779359309425737	1.38514263831205	0.574029234945184	1.38936441457475	0.787184968334614	1.38897823246944
2035	0.289017460737411	1.6627031364581	0.439400127687944	1.64816957730837	0.366534745852019	1.65531959526787	0.554704629564845	1.63565795914206	0.717409517587335	1.61470997678211	0.887871992646906	1.57972439758626	0.72672837802455	1.62548566564151	1	1.59052903876095
2045	0.352598345032488	1.92243106806169	0.523727270328656	1.88421421026151	0.436983599885726	1.90279170672959	0.657922703927523	1.85195174740107	0.845444391362416	1.79879149379448	0.963259269147283	1.71599328653462	0.854666413242913	1.81283361364445	1	1.70811344521278
2055	0.419424449091304	2.16413488178648	0.607532228589741	2.09377770448364	0.508462108542598	2.12834846311751	0.757603847400295	2.0338441807869	0.921129779957173	1.93062700177646	1	1.79747456057894	0.948531323766397	1.94685160779353	1	1.77106397355933
2065	0.495509593862207	2.38745763481565	0.687177340143667	2.27544056017645	0.579564506090721	2.33133925671287	0.855112981371487	2.17846847716735	1	2.01780456267885	1	1.83682154985155	1	2.02753251298884	1	1.79967174164085
2075	0.587409974449816	2.59175806746785	0.768684759045009	2.42907166610971	0.651071968693552	2.51149018408206	0.915031038480708	2.28128128141452	1	2.05756523025222	1	1.85071807576883	1	2.06314726521327	1	1.80783994996897
2085	0.683359298997259	2.76387684255344	0.836507745467853	2.54275784732047	0.725479127816747	2.65958544519722	1	2.3420610903598	1	2.06008107723685	1	1.84132213695595	1	2.06307644302358	1	1.79588175940505
2095	0.782320296290682	2.89107456779832	0.89305189480897	2.60892696441614	0.805084536304482	2.76590799563763	1	2.34252554102771	1	2.02970160525	1	1.80766908040008	1	2.03113683920932	1	1.76161389766534
2105	0.875476106028203	2.97793205877135	1	2.64413164842632	0.874238283737169	2.83663229667425	1	2.31108724545789	1	1.98482175253128	1	1.76465748492673	1	1.98536555406637	1	1.71913639998994
2115	0.912027204428357	3.02171924380468	1	2.6325287292758	1	2.87945337121722	1	2.26380787203368	1	1.93484129590557	1	1.71941187113046	1	1.93492295290252	1	1.67505659834916
2125	1	3.03039139032777	1	2.58785473523685	1	2.86485975699608	1	2.20319469781032	1	1.87787430147941	1	1.66858866497358	1	1.8777637894734	1	1.62570151124056
2135	1	2.99999999999926	1	2.53060796511278	1	2.82204295051889	1	2.1422528718116	1	1.82406394577174	1	1.62141877185846	1	1.82392598021097	1	1.58009736309651
2145	1	2.97369058083536	1	2.49420257963384	1	2.79024361276347	1	2.10943849804018	1	1.80003371627915	1	1.60397425157917	1	1.79996415878113	1	1.56419368513557
2155	1	2.93957803690023	1	2.46025735264169	1	2.75495708568857	1	2.08312841583681	1	1.78301616955362	1	1.59317276220013	1	1.7830664433013	1	1.55483915404979
2165	1	2.90382692725813	1	2.43064298180344	1	2.72060704444924	1	2.06310792175302	1	1.77210820434231	1	1.58794862563851	1	1.77230158397375	1	1.55093337513986
2175	1	2.86995996122869	1	2.40608146330075	1	2.68957233600519	1	2.04878918705315	1	1.76633250912551	1	1.58725821501426	1	1.76667491477831	1	1.55141948589031
2185	1	2.83978300450589	1	2.38658638065235	1	2.66291938346242	1	2.03939215398507	1	1.76471256707455	1	1.59011772272026	1	1.76519965135717	1	1.55531347815423
2195	1	2.8140188412574	1	2.37176535590639	1	2.64090418418511	1	2.03407075392794	1	1.76632781908522	1	1.59563382812475	1	1.76694956278146	1	1.56172934407766
