# Supplementary material for: The impact of human health co-benefits on evaluations of global climate policy
Source: Springer Nature journal article supplement (doi:10.1038/s41467-019-09499-x), 2019-05-07
Supplement: MOESM1 [file 41467_2019_9499_MOESM1_ESM.zip › 41467_2019_9499_MOESM11_ESM.csv]

Year	Main_Ref_decarb	Main_Ref_temp	Main_RICEAIR_decarb	Main_RICEAIR_temp	Test1_SSP1_Ref_decarb	Test1_SSP1_Ref_temp	Test1_SSP1_RICEAIR_decarb	Test1_SSP1_RICEAIR_temp	Test1_SSP3_Ref_decarb	Test1_SSP3_Ref_temp	Test1_SSP3_RICEAIR_decarb	Test1_SSP3_RICEAIR_temp	Test1_SSP4_Ref_decarb	Test1_SSP4_Ref_temp	Test1_SSP4_RICEAIR_decarb	Test1_SSP4_RICEAIR_temp	Test1_SSP5_Ref_decarb	Test1_SSP5_Ref_temp	Test1_SSP5_RICEAIR_decarb	Test1_SSP5_RICEAIR_temp	Test2_decarb	Test2_temp	Test3_decarb	Test3_temp	Test4_decarb	Test4_temp	Test5_decarb	Test5_temp	Test6_decarb	Test6_temp	Test7_Ref_decarb	Test7_Ref_temp	Test7_RICEAIR_decarb	Test7_RICEAIR_temp	Test8_Ref_decarb	Test8_Ref_temp	Test8_RICEAIR_decarb	Test8_RICEAIR_temp
2015	0.182180761969742	1.10723692132051	0.287734291303907	1.11425566623775	0.180086733861042	1.10658333670536	0.232200644349288	1.10990563947739	0.169121522853757	1.11646361696236	0.265670929516629	1.12865492850499	0.174397672882885	1.10888846874108	0.179440081873687	1.10928763892289	0.180935532307911	1.10341149377293	0.248574806679914	1.10651534166046	0.282430479462726	1.11390400669697	0.249172188588909	1.11169642061793	0.322232242043656	1.11654035292372	0.287734553265308	1.11425568360396	0.189437974403222	1.10772084476584	0.26601371691809	1.11277904796304	0.354164092440399	1.11861850120645	0.134264428911648	0.965275289981378	0.258664346133049	0.979273447174861
2025	0.236520761197459	1.38667103385741	0.360223305460132	1.38726580944503	0.232695724173326	1.38496087722409	0.298130269526906	1.38514408577976	0.227071859263689	1.40636284100692	0.33728098245809	1.41678926153596	0.227997601784533	1.38941424462992	0.242907572763217	1.39017013753422	0.236222796492118	1.37837898872925	0.316306231381231	1.3759450192267	0.355965121123071	1.38737226811934	0.314303091968836	1.38705251572261	0.401210805782193	1.38739977477808	0.360225299253575	1.38726591867545	0.242664800883647	1.38657149979973	0.345245489910581	1.38773996426746	0.44860113299836	1.38797711614979	0.177789712341063	1.10814728412789	0.323119573849395	1.11715342125177
2035	0.289017460737411	1.6627031364581	0.439400127687944	1.64816957730837	0.286843538848133	1.65963254670098	0.367126208780853	1.65176431722427	0.279902536144903	1.69295953177941	0.414269548996854	1.69394398488559	0.281934580309003	1.665684665943	0.305814941990955	1.66562387031553	0.289003016924942	1.64839991845924	0.388842180628993	1.63442985240037	0.436134233766438	1.64908083513915	0.383780227795368	1.65367151797318	0.488586706556287	1.64303100018077	0.439401862196984	1.64816949224104	0.296830193263088	1.66175652094841	0.422991350155429	1.65119690157006	0.547944313426653	1.63802609304986	0.221652953964944	1.27148448685009	0.395467921446563	1.26453220518646
2045	0.352598345032488	1.92243106806169	0.523727270328656	1.88421421026151	0.344422649278255	1.91664921180779	0.438907715163646	1.89618894123948	0.331024108323641	1.96242082420879	0.494949139418177	1.94782330917738	0.337060423175068	1.92356526450011	0.369904349499264	1.9209850109936	0.346262191102092	1.89999136001069	0.46563927605014	1.86869342354771	0.52130896799367	1.88601746915477	0.457617763107301	1.89850523748431	0.581485963804526	1.87091579474784	0.523727447761733	1.88421367867299	0.398556905682554	1.92346798433424	0.504314647506866	1.89014360037171	0.65297199847114	1.85621613164559	0.267966594613106	1.43268977637135	0.472911923667985	1.40562605717211
2055	0.419424449091304	2.16413488178648	0.607532228589741	2.09377770448364	0.414667371521091	2.15584899553117	0.511126711658362	2.1171797327862	0.415121514927176	2.21948924193239	0.574975675478807	2.17685928798915	0.403252690424727	2.16317043517135	0.436992173882324	2.1552244675636	0.407889959401216	2.1329712995594	0.543083000293711	2.07814168809283	0.60636806102699	2.09647068326106	0.532128827549026	2.12037591749689	0.672670785445153	2.06903927690596	0.607533875543915	2.0937770398026	0.458985488543241	2.16015129713858	0.590275629135566	2.10371298288907	0.759459471943653	2.0402465454947	0.320238782063097	1.59390809701994	0.548963986016677	1.53898562588497
2065	0.495509593862207	2.38745763481565	0.687177340143667	2.27544056017645	0.487002996238545	2.37487748497916	0.583256144326871	2.31380820229389	0.483381256974212	2.455933650623	0.651930501735128	2.37933606087157	0.472235104645681	2.38269977716561	0.510058451268644	2.36774052807416	0.474168146945759	2.34740817633188	0.619401233705757	2.26255231537117	0.688597231635787	2.27898493713839	0.605306684383683	2.31844946568577	0.757433914646924	2.23548860849375	0.687231608425692	2.27544450534129	0.523601304989992	2.37445357338539	0.684123527802591	2.29098337031165	0.850453628885944	2.18505554920725	0.376462974376991	1.75867703151736	0.618736302577261	1.66635831854081
2075	0.587409974449816	2.59175806746785	0.768684759045009	2.42907166610971	0.551858072059758	2.57120808603566	0.656212365781371	2.48539309646368	0.554290800826929	2.67143829635529	0.726138080434887	2.55410430947904	0.55251245401122	2.58133708048755	0.590972322027319	2.55732519537326	0.554901255343057	2.54347992293965	0.695020688765202	2.42169621110209	0.773751026851983	2.43310273325796	0.677631800694985	2.49236175547481	0.842340791213952	2.36928724321825	0.768724932576666	2.42906801947611	0.595275603994626	2.56794244716168	0.783646811690077	2.4493032644168	0.917010902314948	2.28898575888422	0.432178701149292	1.92474942333848	0.680896511708207	1.78655559550551
2085	0.683359298997259	2.76387684255344	0.836507745467853	2.54275784732047	0.64517574063421	2.73831573807667	0.732191045711066	2.62233518737413	0.654479350323691	2.86020399859534	0.800428501567157	2.69151011252962	0.650186027973659	2.74822287726604	0.679630340968651	2.71285647481058	0.642222628284851	2.70968469699049	0.765420191245379	2.54600525965397	0.842539128444683	2.5461795822868	0.751712362404451	2.63295357068656	0.895720342123271	2.45800402793425	0.836536998316149	2.54274180200401	0.676354518840091	2.73170435804497	0.857064996276831	2.56289152934315	1	2.3496664606755	0.502743984511065	2.08154101464447	0.737997369016604	1.88804620329962
2095	0.782320296290682	2.89107456779832	0.89305189480897	2.60892696441614	0.748817529506054	2.86273097511153	0.814773353871214	2.71461544244131	0.713137605518189	2.99999999999818	0.864954753324886	2.78067166180379	0.750941740400733	2.86947612708104	0.774041299339663	2.82271946703252	0.739826441003996	2.83493381860582	0.834911772886127	2.62818620739728	0.902494041084754	2.61103708409992	0.82420042312116	2.73008456328229	1	2.5031573917819	0.89307568380112	2.60889783764047	0.774657746535672	2.85584470916245	0.913914989076171	2.62446040881601	1	2.34990755839731	0.595578021481217	2.21741629828653	0.800217500216215	1.96188234553329
2105	0.875476106028203	2.97793205877135	1	2.64413164842632	0.828307920278838	2.94629729202388	0.885958224717517	2.76916281604351	0.829446144155479	3.1122305647891	0.913006053254996	2.83070497079879	0.82973874872786	2.95010808452136	0.858589064108196	2.89342592203605	0.81918094840342	2.92426352306414	0.907642443667297	2.67815499097097	1	2.64280811815374	0.894836125878668	2.79252903171407	1	2.49664213137006	1	2.64408848598603	0.838300694491689	2.94050079694306	1	2.650651906408	1	2.31815187250307	0.692748506183129	2.33903378397888	1	2.04109892549053
2115	0.912027204428357	3.02171924380468	1	2.6325287292758	0.905216733453558	2.99376481494798	1	2.79157116934824	0.88034966165303	3.18077778823165	1	2.85375801356173	0.904466380683943	2.99500380568469	1	2.93009166830469	0.884127138547959	2.98099774226432	1	2.69878026280701	1	2.6291285748516	1	2.82532599543458	1	2.46158731181536	1	2.63247760068148	1	2.99999999999639	1	2.6333561184703	1	2.27048772043729	0.787685584736274	2.44661398603161	1	2.06028411428601
2125	1	3.03039139032777	1	2.58785473523685	1	2.99999999999999	1	2.76221888216319	1	3.2145969396112	1	2.82518377706621	1	2.99999999999948	1	2.908067741232	0.911061833643595	2.99999999999511	1	2.6733368970261	1	2.58326686078778	1	2.80525049933337	1	2.40522652324624	1	2.58779956330581	1	2.99430736132123	1	2.58516492038207	1	2.2094494982716	1	2.54093057512817	1	2.0497333162013
2135	1	2.99999999999926	1	2.53060796511278	1	2.96601267504973	1	2.70933650976646	1	3.19475909984532	1	2.77164430951995	1	2.965647342863	1	2.8582513175861	1	2.99914323417586	1	2.62740420234592	1	2.52540631379432	1	2.75987297101858	1	2.34370275299825	1	2.5305512320318	1	2.95540097254029	1	2.5258135704471	1	2.14806366267754	1	2.56599095847872	1	2.04329918840116
2145	1	2.97369058083536	1	2.49420257963384	1	2.93637543631537	1	2.67148256240205	1	3.16937553854841	1	2.73094590764044	1	2.93627983861722	1	2.8209134216205	1	2.9920952834009	1	2.59768330109581	1	2.48875020417843	1	2.72734562560318	1	2.30753395720948	1	2.49414580710273	1	2.92439446414496	1	2.48821138922239	1	2.11480363695918	1	2.60184671275381	1	2.07477685859522
2155	1	2.93957803690023	1	2.46025735264169	1	2.90004072443155	1	2.6335756040111	1	3.13011127433769	1	2.68784924448539	1	2.9006291904555	1	2.78205208705292	1	2.97077479971169	1	2.56785542444974	1	2.45477705136473	1	2.69243822689028	1	2.27643220527025	1	2.46020142797388	1	2.88803272905327	1	2.4536409183205	1	2.08805607212485	1	2.63923153095427	1	2.10803086671736
2165	1	2.90382692725813	1	2.43064298180344	1	2.86356671423658	1	2.59948930575118	1	3.08565237677844	1	2.64644840270063	1	2.86506501511159	1	2.74620919010521	1	2.94379375923748	1	2.54103652564289	1	2.42526514198688	1	2.65909568099177	1	2.25103010040154	1	2.43058837873145	1	2.85156423815753	1	2.42375425789193	1	2.06761491506402	1	2.66989933607438	1	2.13401457013495
2175	1	2.86995996122869	1	2.40608146330075	1	2.83055229080708	1	2.57105660502697	1	3.04128188387269	1	2.6090046896155	1	2.83303796366755	1	2.71562451257532	1	2.91621803407439	1	2.51866065280379	1	2.40087637343289	1	2.62938558367248	1	2.23126147462705	1	2.40602839094291	1	2.81790375829369	1	2.3991337775218	1	2.05290040639502	1	2.70065291001565	1	2.15991028455465
2185	1	2.83978300450589	1	2.38658638065235	1	2.80267215144476	1	2.54880972745272	1	2.99999999999915	1	2.57656012695779	1	2.80611684640246	1	2.69107503975731	1	2.89080451561372	1	2.50111716422893	1	2.38158595700172	1	2.60417633550289	1	2.21665259057758	1	2.38653488342335	1	2.7884579692219	1	2.37970601176449	1	2.04314004141373	1	2.73143346291539	1	2.18582077575562
2195	1	2.8140188412574	1	2.37176535590639	1	2.7804006010218	1	2.53250163138156	1	2.96330604438918	1	2.54937316046647	1	2.78470913924754	1	2.67245993794526	1	2.86884766406404	1	2.48818680408602	1	2.36697766073363	1	2.58360195983153	1	2.20652311674727	1	2.37171537996678	1	2.76369145061462	1	2.36502598412819	1	2.03749447511302	1	2.7617822094822	1	2.21133958767922
